# Supplementary figures and images for: A Compact Novel Three-Port Integrated Wide and Narrow Band Antennas System for Cognitive Radio Applications
Source: Hindawi journal article supplement (doi:10.1155/2016/2829357), 2016-01-01

First case:

dB(S(1,1)):


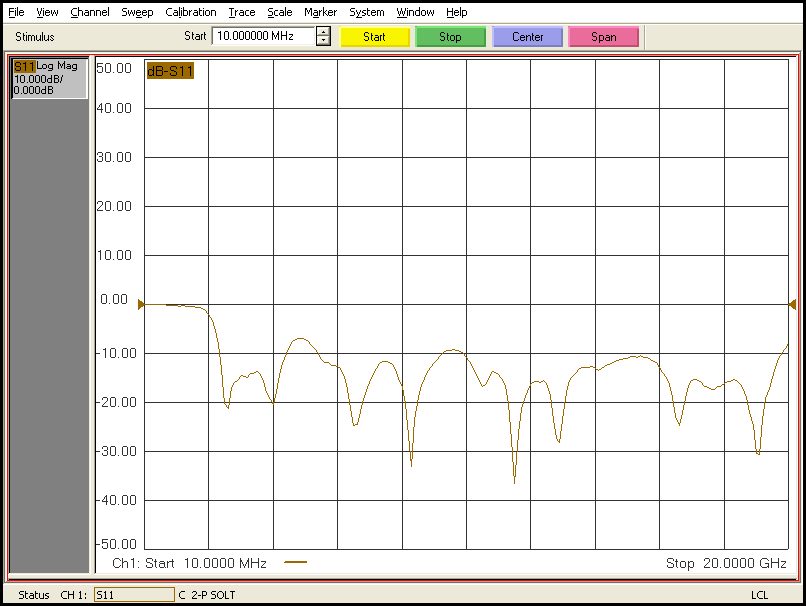


dB(S(2,2)):


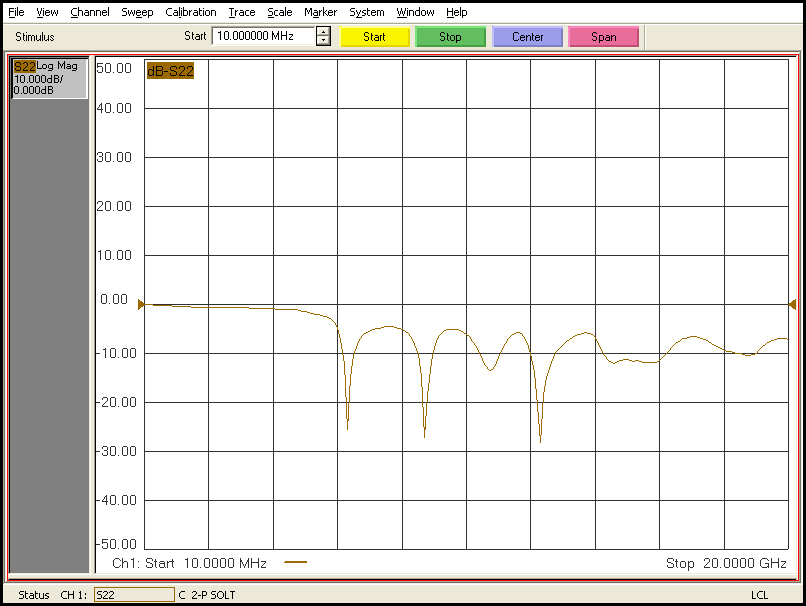


dB(S(1,2)):


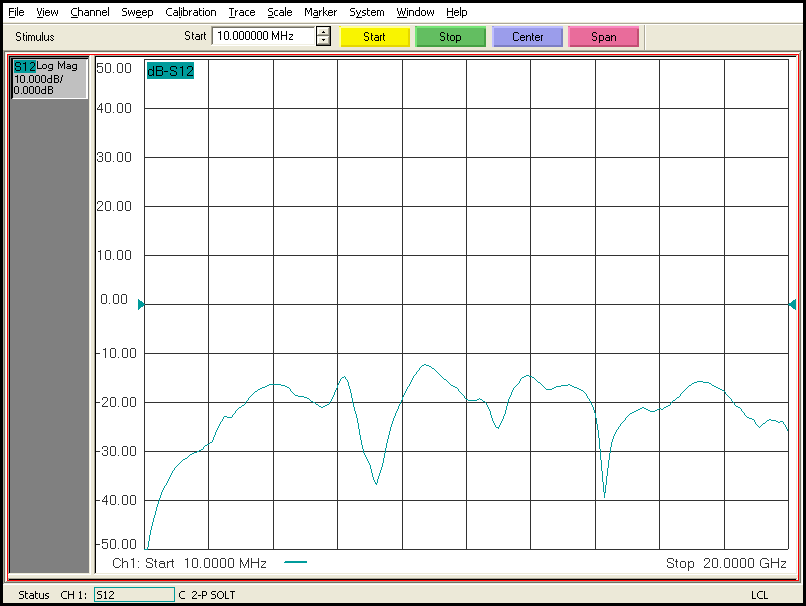


Second case:

dB(S(1,1)):


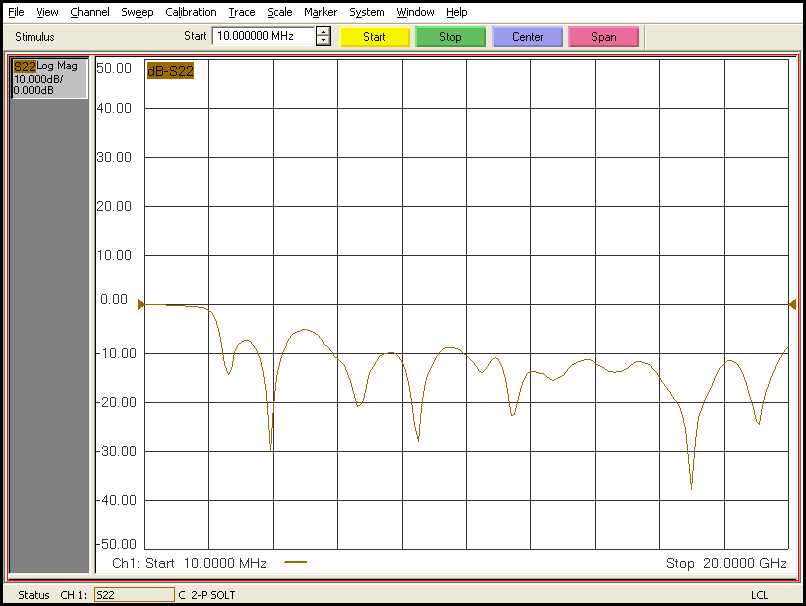


dB(S(3,3)):


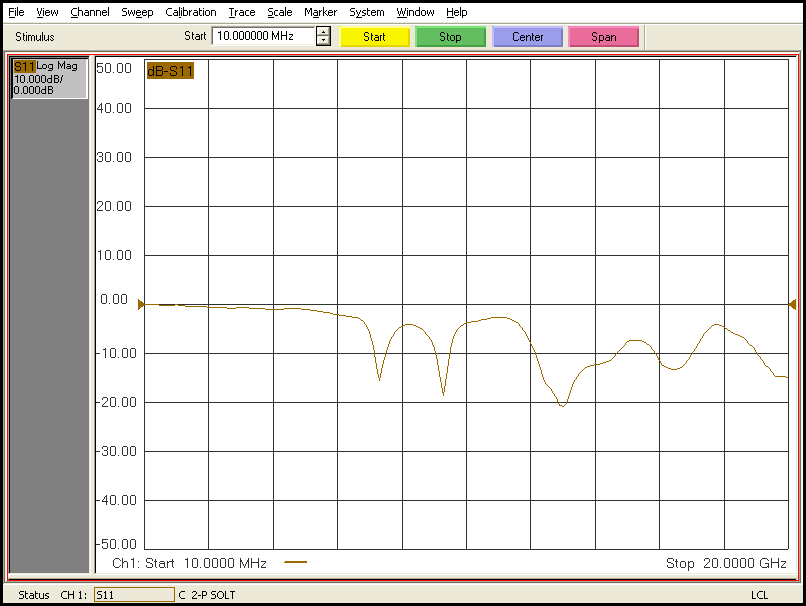


dB(S(1,3)):


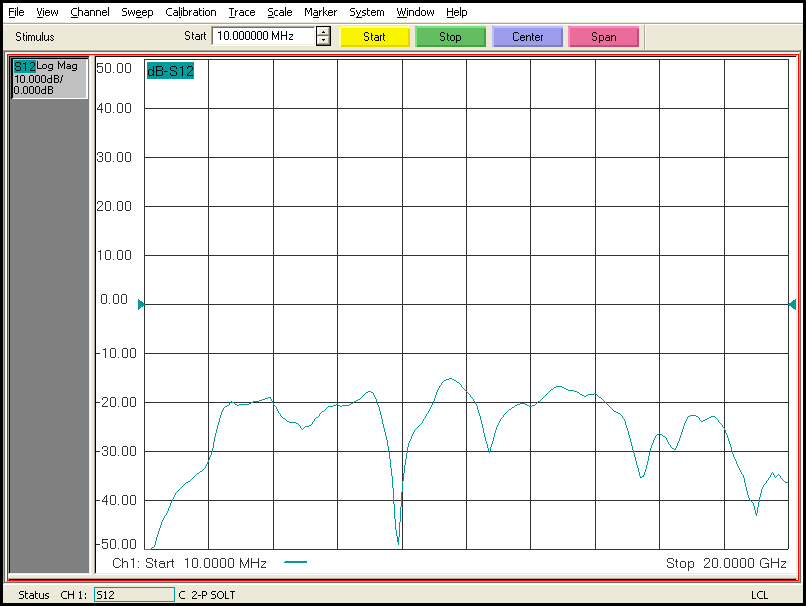

Supplement: f1 [file 2829357.f1.docx]
